# Supplementary material
Source: publisher site journal article supplement (https://www.degruyterbrill.com/publication/journal_key/MEDGEN/downloadAsset/MEDGEN_Instructions%20for%20Authors%20-%20Checklist--en.pdf)
Supplement: Supplementary file 1 [file MEDGEN_Instructions%20for%20Authors%20-%20Checklist--en.pdf]

## Information for authors – Checklist

### Checklist manuscript

- Please write the manuscript in English and always send it as docx-file
- Complete address of the author of correspondence with tel. no., fax, e-mail
- Total length: max. **25.000** characters incl. spaces (including literature, summary and keywords)
- Short, concise title of the article, possibly an explanatory subtitle
- English title, English abstract (max. 800 characters), 5 keywords
  - Short introduction to the topic
  - Concise and short as possible subheadings  
4 hierarchies are possible
  - Conclusion / Summary / Outlook (max. 1.000 characters)
- **Ca. 4** figures or tables mentioned chronologically in the text; if necessary, create a list of abbreviations / glossary
- **Ca. 30** literature citations

Our journal is primarily intended to serve the further education of medical and scientific colleagues in the field of human genetics.

The aim is to provide our readers with a short and comprehensive overview on a specific topic.

In addition to providing background knowledge, practical procedures can also be presented in the form of "diagnostic guidelines" and tabular overviews.

### Checklist reference list

- Please limit to 30 references if possible
- Please use only quotation numbers in square brackets in the text
- Please sort the literature by numbers
- In principle, the use of literature management programs like *Endnote* is possible

#### Citation of articles in journals:

All authors' names with the initials of their first names followed by no period, the year in round brackets, the title of the article, the title of the journal abbreviated according to Index Medicus, the volume number with colon, the number of the first and last pages of the work, e.g.:

[Schuler M, Oster P \(2005\) Zunehmende Bedeutung der Opiode in der Geriatrie. Schmerz 19:302-307](#)

#### Citations of books:

All author names with initials of the first names without period, year in round brackets, article title, "In:" followed by editor names with initials of the first names without period, book title, publishing place: publisher name. Page numbers, e.g.:

[Bork K \(2005\) Arzneireaktionen. In: Braun-Falco O, Plewig G, Wolff HH, Burgdorf WHC, Landthaler M \(Hg\) Dermatologie und Venerologie. Berlin Heidelberg New York: Springer. 431-446](#)

#### Address

Dr. Christine Scholz  
GfH-Redaktion Zeitschrift medizinischegenetik  
Inselkammerstr. 2  
82008 München-Unterhaching  
Tel 089-55 02 78 55  
Fax 089-55 02 78 56  
[redaktion@medgenetik.de](mailto:redaktion@medgenetik.de)
